# Supplementary material
Source: PubMed Central journal article supplement (PMC6529651)
Supplement: IAI.00077-19-s0001.pdf [file IAI.00077-19-s0001.pdf]

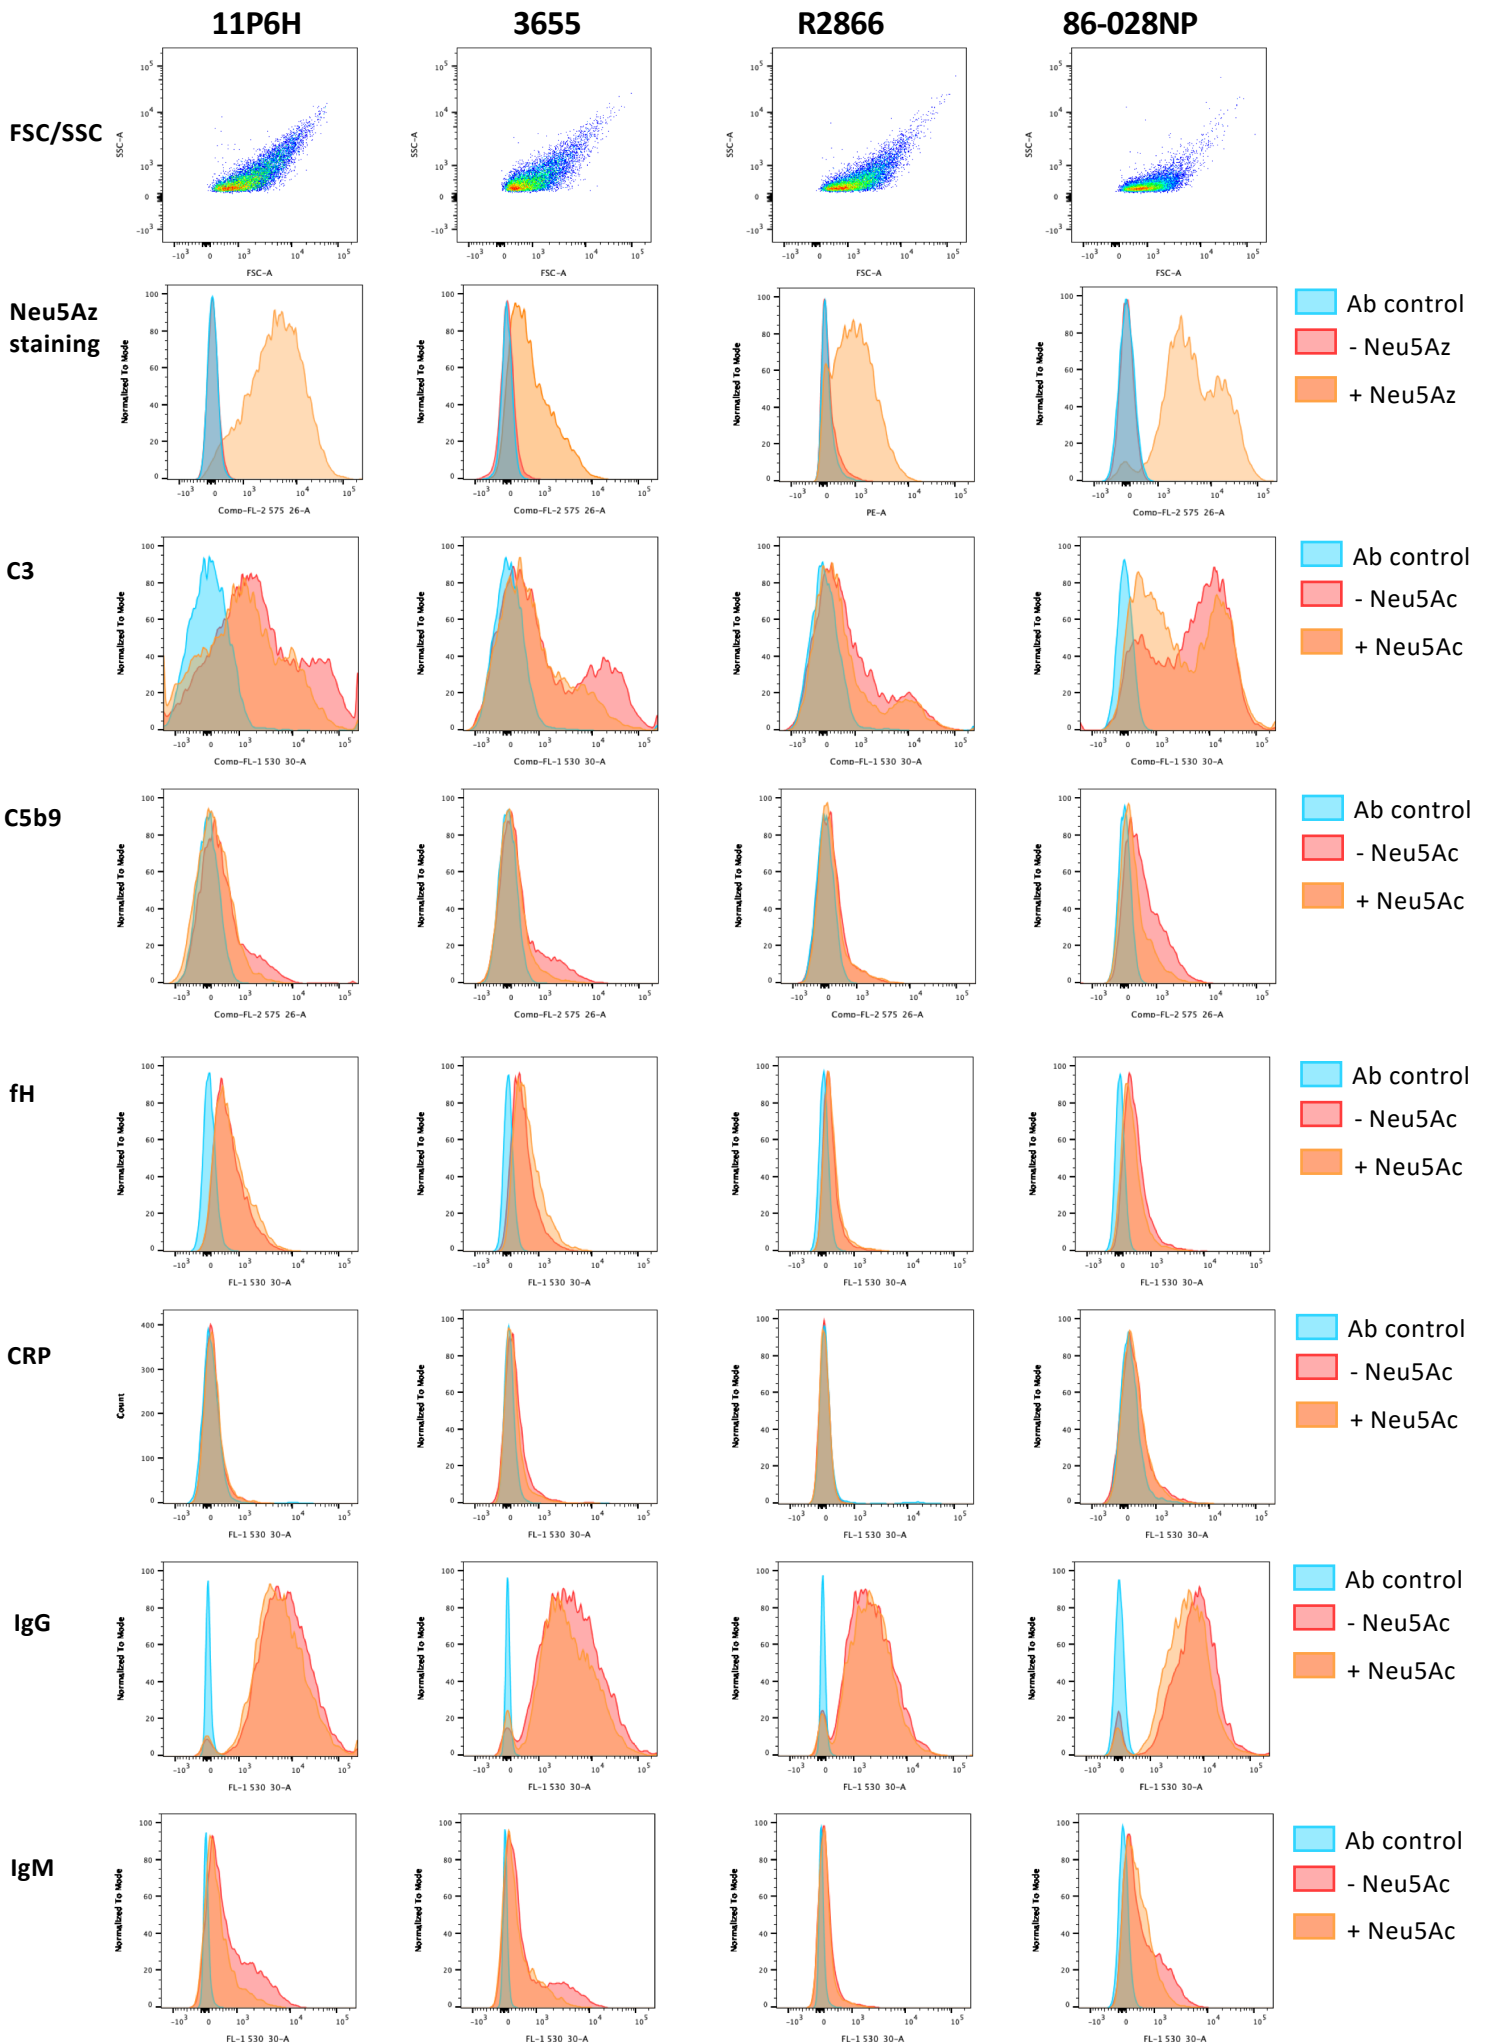

**Supplemental material.** Representative forward (FSC)/sideward (SSC) scatter and histograms for Neu5Az, C3, C5b9, fH, CRP, IgG and IgM staining of NTHi strains 11P6H, 3655, R2866 and 86-028NP.
